# Supplementary material
Source: PubMed Central journal article supplement (PMC11334612)
Supplement: NIHMS2012094-supplement-Supplementary_Material.pdf [file NIHMS2012094-supplement-Supplementary_Material.pdf]

Supplementary Figure 1

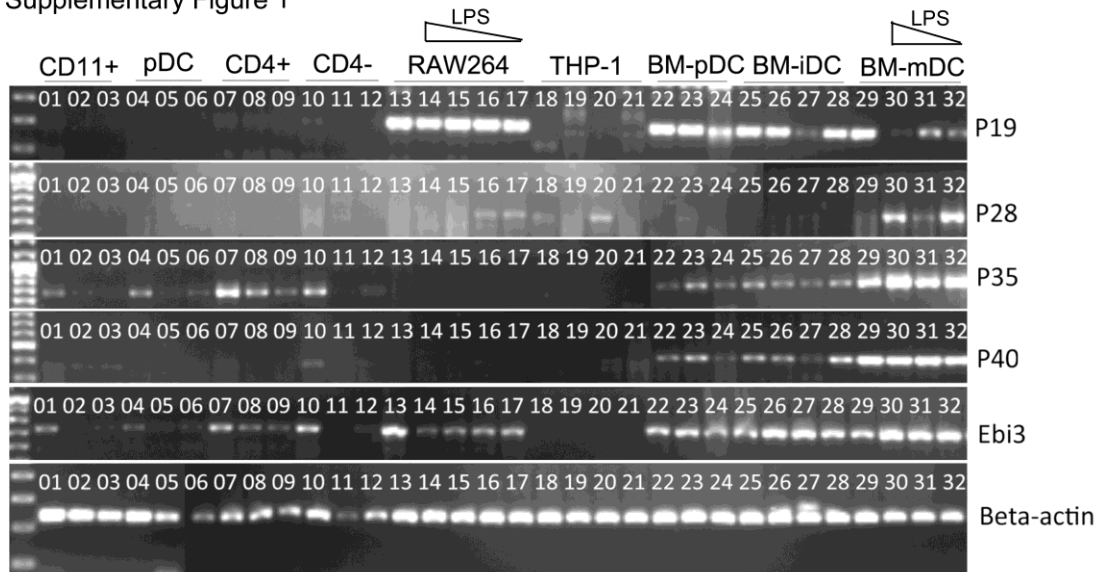

1 **Supplementary Figure 1.** IL-39 expression in DCs and Macrophages. CD11c<sup>+</sup>  
2 myeloid DCs (CD11<sup>+</sup>), CD303<sup>+</sup> plasmacytoid DCs (pDC), CD4<sup>+</sup> T cells, CD8<sup>+</sup> T cells  
3 were sorted using microbeads. RAW264.7 cells: mouse macrophage line, stimulated  
4 for 1 day with LPS (10, 5, 2, 1 µg/ml); THP-1 cells: human monocytic cell line.  
5 BM-pDCs refer to Lin<sup>-</sup>ScaI<sup>+</sup> cells from Bone marrow (BM) stimulated for 9 days with  
6 stem cell factor (100 ng/ml), IL-3 (20 ng/ml), M-CSF (50 ng/ml), GM-CSF (5 ng/ml),  
7 and FMS-related tyrosine kinase-3 (FLT3) ligand (25 ng/ml); BM-iDC refer to pDCs  
8 stimulated for 3 additional days with GM-CSF (100 ng/ml) plus IL-4 (1500 U/ml).  
9 BM-mDCs were obtained after overnight stimulation of iDCs with LPS (5, 2, 1 µg/ml).  
10 IL-12 family subunits p19, p28, p35, p40 and Ebi3 mRNA expression were analyzed  
11 by RT-PCR. The results are representative of three independent experiments.  
12

Supplementary Figure 2

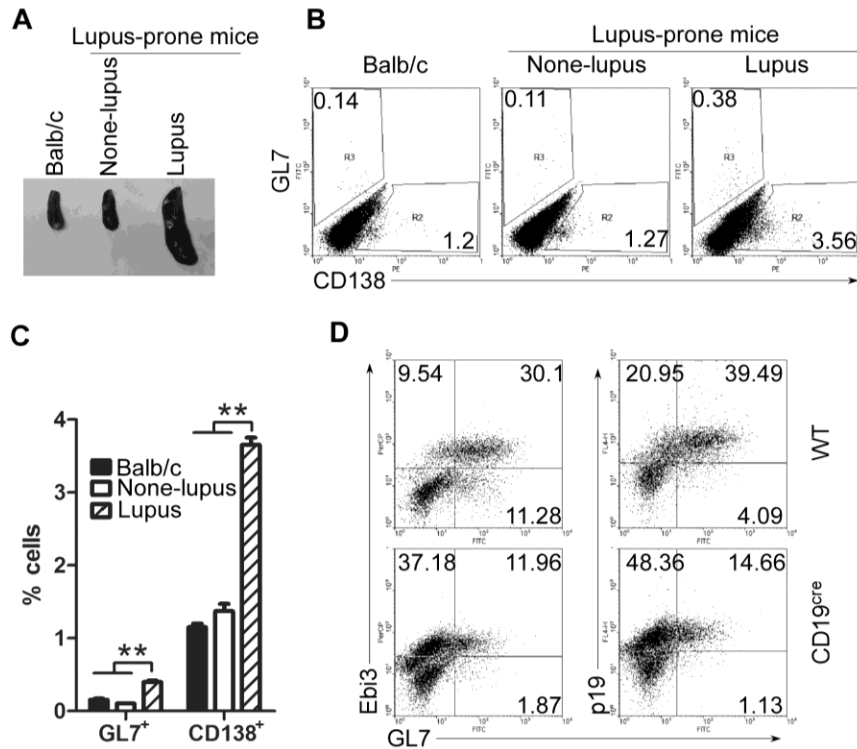

13 **Supplementary Figure 2.** Activated GL7<sup>+</sup> B cells increased in lupus-like mice or  
 14 LPS-stimulated B cells. **(A)** The morphology of spleen from 8-month-old female Balb/c  
 15 and none lupus MRL/+ and lupus-like MRL/lpr mice. The results are representative of  
 16 6 spleens per experiment from three independent experiments. **(B, C)** Total B cells  
 17 from 8-month-old female Balb/c and none lupus MRL/+ and lupus-like MRL/lpr mice  
 18 were analyzed by FACS. The percentages of GL7 and CD138-expressing total B cells  
 19 **(B)**, statistical analysis of the percentage **(C)** are shown. **(C)** Data are shown as mean +  
 20 SEM (n=6) and are representative of three independent experiments. \*\*P < 0.01, (two  
 21 tailed Student's *t*-test). **(D)** Splenic B cells from wild-type and CD19-deficient (CD19<sup>cre</sup>)  
 22 mice were stimulated for 3 days with LPS (1 μg/ml) and analyzed by the intracellular  
 23 cytokine-staining assay. Quadrants indicate percentages of p19 and Ebi3-expressing  
 24 GL7<sup>-</sup> and GL7<sup>+</sup> B cells. The results are representative of three independent  
 25 experiments.

Supplementary Figure 3

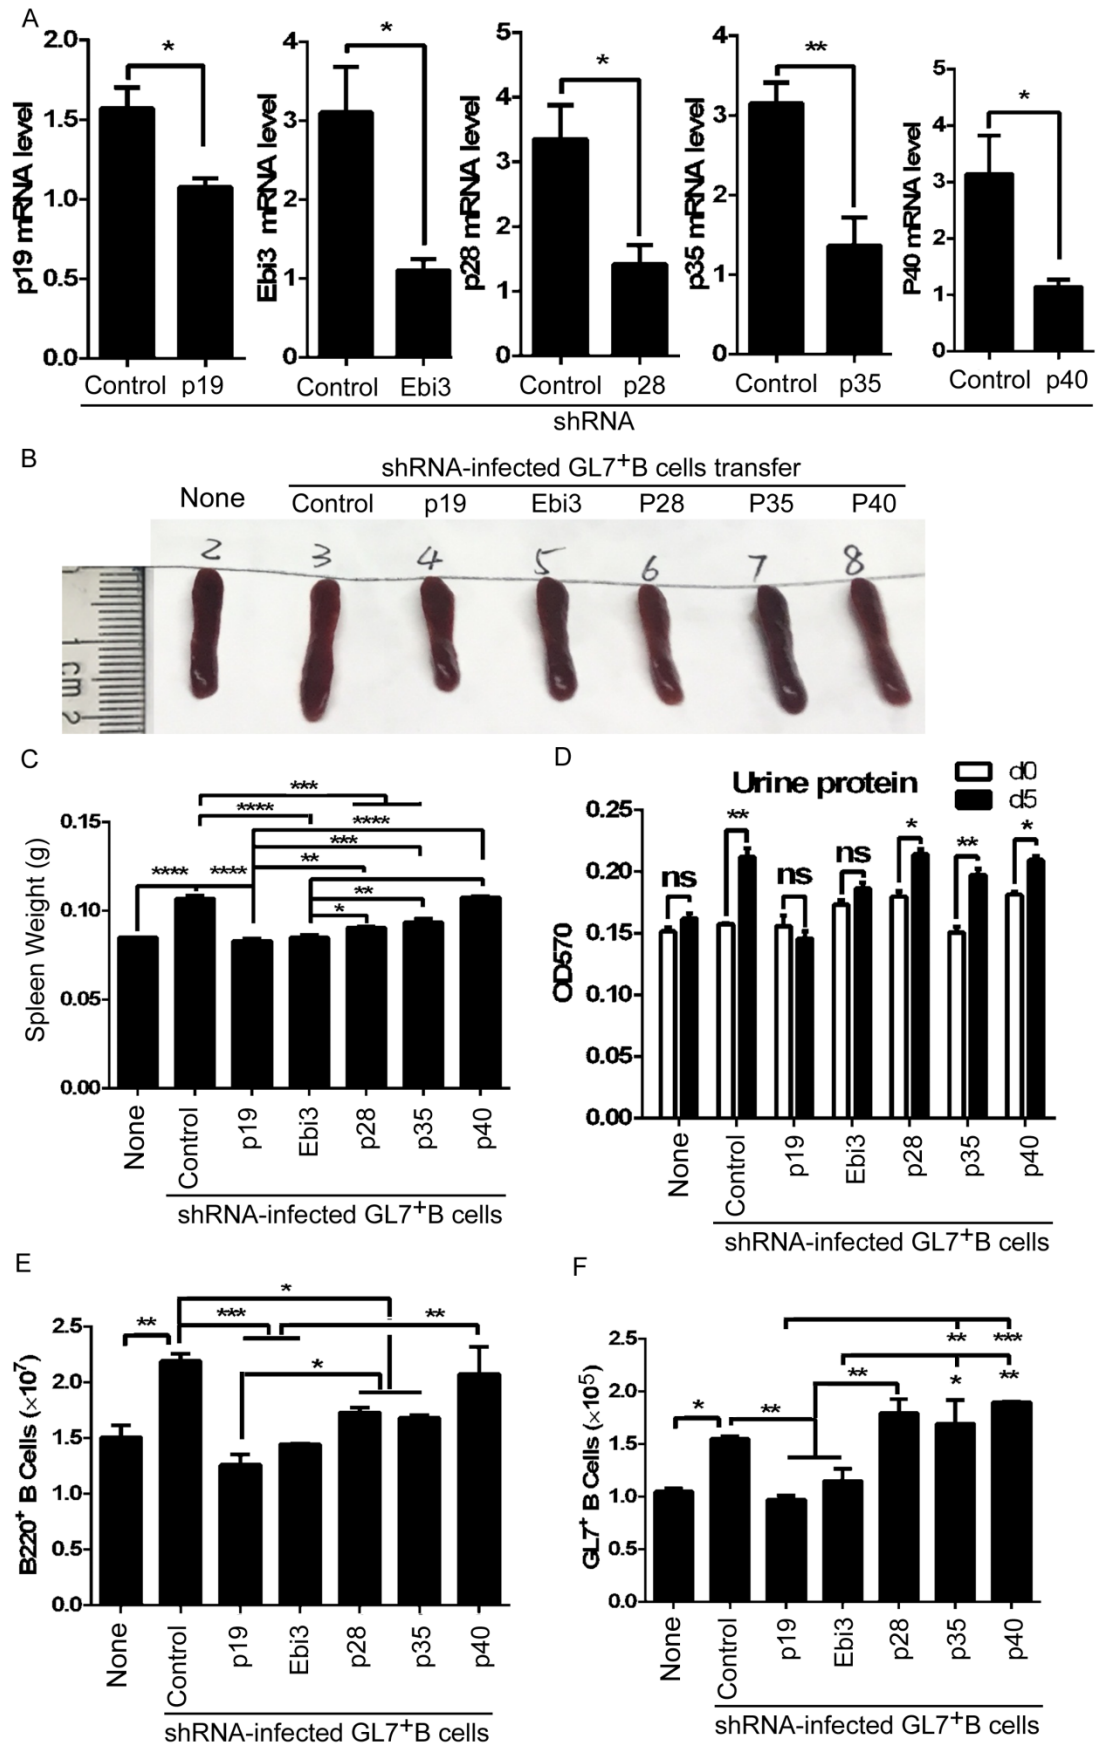

27 **Supplementary Figure 3.** IL-39-deficient GL7<sup>+</sup>B did not induce inflammation in  
28 lupus-like Mice. (A) GL7<sup>+</sup> B cells were sorted from 8-months-old female lupus-like  
29 MRL/lpr mice were sorted by FACS and infected with control shRNA or IL-12 family  
30 subunits p28, p35 or p40, p19 or Ebi3-specific shRNA. On day 1 after infection, p28,  
31 p35, p40, p19 and Ebi3 mRNA expression were analyzed by qPCR. Data are shown as  
32 mean + SEM (n=8) and are representative of three independent experiments. (B-F) 5 X  
33 10<sup>6</sup> control, p28, p35, p40, p19 and Ebi3-specific shRNA-infected GL7<sup>+</sup>B220<sup>+</sup> B cells  
34 per mouse were *i.v.* injected into 8-weeks-old female lupus-like MRL/lpr mice (6 mice  
35 per group). None cells and control shRNA-infected GL7<sup>+</sup>B cells-transferred  
36 8-weeks-old female lupus-like MRL/lpr mice were used as none cells transfer (None)  
37 and shRNA (Control) control, respectively. (B, C) On days 14 after cell transfer, the  
38 morphology (B) and weight (C) of the spleen are shown; (D) Proteinuria was measured  
39 on day-0 and day-5 after cell transfer; (E, F) On days 14 after cell transfer, the absolute  
40 numbers of B220<sup>+</sup> (E) and GL7<sup>+</sup> (F) B cells per spleen are shown. (C-F) Data are  
41 shown as mean + SEM (n=6) and are representative of three independent experiments.  
42 \**P* < 0.05, \*\**P* < 0.01, \*\*\**P* < 0.001, \*\*\*\**P* < 0.0001 (two tailed Student's *t*-test).  
43

Supplementary Figure 4

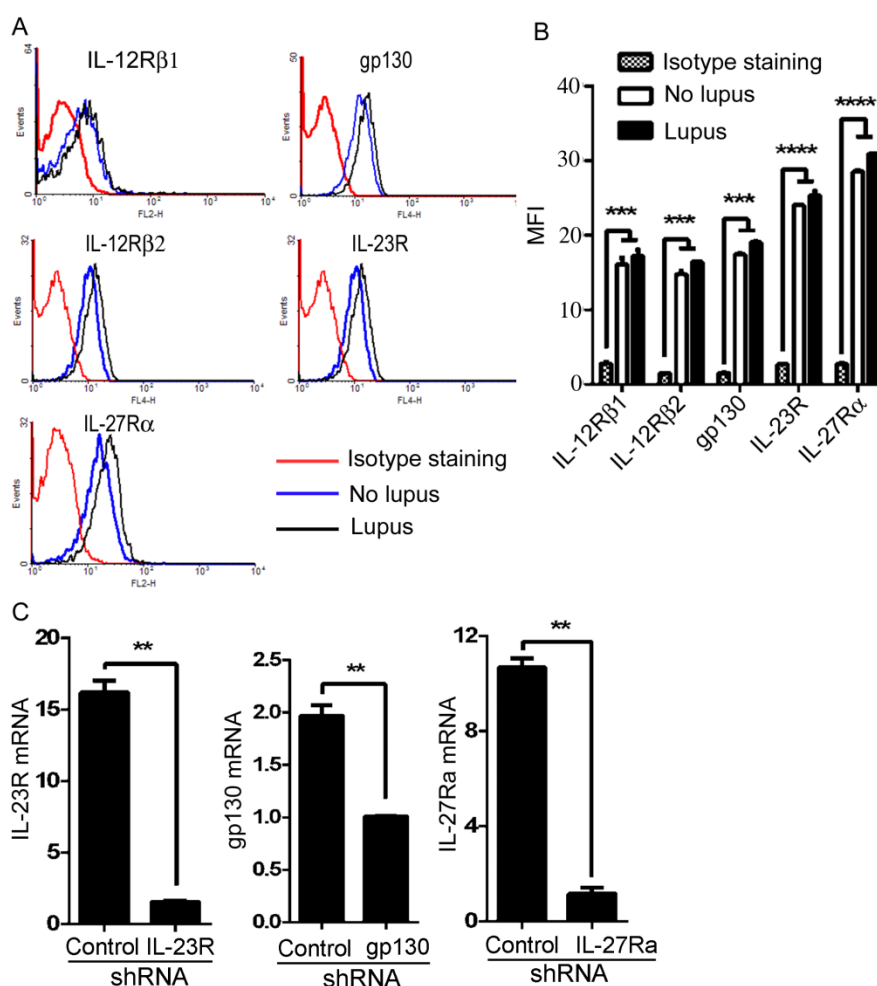

44 **Supplementary Figure 4.** The expression and depletion of IL-12 subunits on the  
 45 surface of B cells. **(A, B)** IL-12Rβ1, IL-12Rβ2, IL-23R, gp130 or IL-27R expression  
 46 **(A)** and the mean fluorescence intensity (MFI) **(B)** on the surface of the splenic B cells  
 47 from 8-months-old female none lupus MRL/+ and lupus-like MRL/lpr were analyzed  
 48 by FACS. Isotype antibody was used as the staining control. **(C)** B220<sup>+</sup> B cells were  
 49 sorted from 8-weeks-old female C57BL/6 mice by B220 microbeads and infected with  
 50 control or IL-23R, IL-27Ra, gp130-specific shRNA. On day 2 after infection, IL-23R,  
 51 IL-27Ra and gp130 mRNA expression was determined using qPCR assay. **(B, C)** Data  
 52 are shown as mean + SEM (n=5) and are representative of three independent  
 53 experiments. \*\*P < 0.01, \*\*\*P < 0.001, \*\*\*\*P < 0.0001, (two tailed Student's *t*-test).
